# Supplementary material for: Can we afford storage? A dynamic net energy analysis of renewable electricity generation supported by energy storage
Source: Royal Society of Chemistry journal article supplement (doi:10.1039/c3ee42125b), 2014-01-01
Supplement: c3ee42125b2.xlsx [file c3ee42125b2.xlsx]

## Sheet: sc-Si
AUTHOR	Schaeffer	Schaeffer	Mathur	Mathur	Kato	Kato	Alsema	Knapp	GEMIS	Gurzenich	Krauter	Fthenakis	Muneer	de Wild-Scholten	Amor	Laleman
YEAR	1990	1990	2002	2004	1997	1997	2000	2000	2002	2004	2004	2006	2006	2009	2009	2010
LIFETIME [yrs]	25	25	25	25	25	25	25	25	25	25	25	25	25	25	25	25
CAPACITY [kW]	2500	25000	0.035							1.56			14.4		3	3
EFFICIENCY [%]	14	15.5	13				14			12.7		14		13.2		14
WAFER THICKNESS [μm]												300		180
PRIMARY or ELECTRICITY	PRIMARY (35%)	PRIMARY (35%)	PRIMARY (35%)	ELECTRICITY	ELECTRICITY	ELECTRICITY	PRIMARY (35%)	ELECTRICITY	PRIMARY (undefined)	PRIMARY (31.7%)	MIX	PRIMARY (31%)	PRIMARY (undefined)	PRIMARY (29%)	PRIMARY (undefined)	PRIMARY (35%)
CONVERSION FACTOR [%]	35	35	35	100	100	100	35	100	30	31.7	30	31	30	29	30	35
CAPACITY FACTOR [%]	15	15	15	15	15	15	15	15	15	15	15	15	15	15	15	15
RATED INSOLATION [W/m^2]							1000					1000		1000
CONSTRUCTION TIME [yrs]				1
TOTAL MATERIALS [kWh(e)/Wp]							3.18179
ERROR							0
TOTAL MANUFACTURE [kWh(e)/Wp]							0.559417
ERROR							0
TOTAL CELL [kWh(e)/Wp]							3.74121
ERROR							0
TOTAL MODULE [kWh(e)/Wp]	6.125	3.85	14.1925		12.4	17.7	4.69696	5.59722	4.134	5.07849		3.0754	3.75	1.76978
ERROR	0	0	0		0	0	0	0	0	0		0	0	0
TOTAL SYSTEM [kWh(e)/Wp]	7.175	4.27		15.25			6.04419			5.73987	5.5574	3.40877	4.93125	2.29339		3.35417
ERROR	0	0		5.25			0			0	0	0	0	0		0.194444
TOTAL SYSTEM [kWh(e)/kWh(e)]	0.218417	0.129985		0.464231			0.183994			0.17473	0.169175	0.103768	0.150114	0.0698141		0.102106
ERROR	0	0		0.159817			0			0	0	0	0	0		0.00591916

## Sheet: mc-Si
AUTHOR	Schaeffer	Schaeffer	Prakash	Frankl	Frankl	Frankl	Alsema	Zhai	Zhai	Gurzenich	Mathur	Krauter	Battisti	Fthenakis	Alsema	Mason	Kannan	Mohr	Pacca	Raugei	Roes	Zhai	Ito	Ito	Stoppato	de Wild-Scholten	Amor	Laleman	Zhai
YEAR	1990	1990	1995	1997	1997	1997	2000	2001	2004	2004	2004	2004	2005	2006	2006	2006	2006	2007	2007	2007	2007	2007	2008	2008	2008	2009	2009	2010	2011
LIFETIME [yrs]	25	25	25	25	25	25	25	25	25	25	25	25	25	25	25	25	25	25	25	25	25	25	25	25	25	25	25	25	25
CAPACITY [kW]	2500	25000								1.56			1			3500	2.7	1	10.4				152	120	52.52		3	3
EFFICIENCY [%]	12	13.5	10	12.1	12.1	12.1	13	13.2	13.2	12.1			10.7	13.2	13.2	12.2	11.86	14.8	12.92		13.2	13.2	15.8	12.8	16	13.2		13.2	13.2
WAFER THICKNESS [μm]								200	200					285				300				200				200			200
PRIMARY or ELECTRICITY	PRIMARY (35%)	PRIMARY (35%)	PRIMARY (35%)	PRIMARY (39.1%)	PRIMARY (39.1%)	PRIMARY (39.1%)	PRIMARY (35%)	PRIMARY (31%)	PRIMARY (31%)	PRIMARY (31.7%)	ELECTRICITY	MIX	PRIMARY (undefined)	PRIMARY (31%)	PRIMARY (UCTE)	PRIMARY (33%)	PRIMARY (33%)	PRIMARY (41%)	PRIMARY (33%)	PRIMARY (32%)	PRIMARY (36%)	PRIMARY (31%)	PRIMARY (30%)	PRIMARY (30%)	PRIMARY (undefined)	PRIMARY (29%)	PRIMARY (unspecified)	PRIMARY (35%)	PRIMARY (31%)
CONVERSION FACTOR [%]	35	35	35	39.1	39.1	39.1	35	31	31	31.7	100	30	30	31	31	33	33	41	33	32	36	31	30	30	30	29	30	35	31
CAPACITY FACTOR [%]	15	15	15	15	15	15	15	15	15	15	15	15	15	15	15	15	15	15	15	15	15	15	15	15	15	15	15	15	15
RATED INSOLATION [W/m^2]			1000	1000	1000	1000	1000							1000	1000	1000	1000	1000							1000	1000
CONSTRUCTION TIME [yrs]											1
TOTAL MATERIALS [kWh(e)/Wp]				5.99156	5.99156	5.99156	2.22444	1.43519	1.10901				3.4769		1.50042							0.82197			0.668828				0.619739
ERROR				3.34414	3.34414	3.34414	0	0	0				0		0							0			0				0
TOTAL MANUFACTURE [kWh(e)/Wp]				0.762971	0.762971	0.762971	0.63	1.01115	0.75021				0.0887375									0.632786			0.309694				0.567551
ERROR				0	0	0	0	0	0				0									0			0				0
TOTAL CELL [kWh(e)/Wp]			9.717	6.75453	6.75453	6.75453	2.85444	2.44634	1.85922				3.56563		1.8266							1.45476			0.978522				1.18729
ERROR			1.45	3.34414	3.34414	3.34414	0	0	0				0		0							0			0				0
TOTAL MODULE [kWh(e)/Wp]	5.775	2.625	11.677	7.56239	7.56239	7.56239	3.76411	3.14626	2.34549	1.99271			4.03352	2.41372	2.08754	1.39003	5.2812	3.18889	3.15333	3.59407	2.49	1.7825	1.0895	1.37392	1.19712	1.64773			1.51785
ERROR	0	0	0.190001	3.34361	3.34361	3.34361	0	0	0	0			0	0	0	0		0	0	1.94667	0	0	0	0	0	0			0
TOTAL SYSTEM [kWh(e)/Wp]	7	3.15		9.26785	8.23559	8.14583	5.20749			2.67187	14	3.154	4.43042	2.7673	2.41372	1.73286	6.48796			4.39407	2.98	2.71853	2.17458	2.77758		2.17134	1.66408	3.15972
ERROR	0	0		3.34361	3.34361	3.34361	0			0	6	0	0.825	0	0	0	0			1.92444	0	0	0	0		0	0	0
TOTAL SYSTEM [kWh(e)/kWh(e)]	0.21309	0.0958904		0.282126	0.250703	0.247971	0.158523			0.0813353	0.42618	0.0960122	0.134868	0.0842404		0.0527507	0.197503			0.133762	0.0907154	0.0827558	0.0661974	0.0845535		0.0660986	0.050657	0.0961864
ERROR	0	0		0.101784	0.101784	0.101784	0			0	0.182648	0	0.0251142	0		0	0			0.0585828	0	0	0	0		0	0	0

## Sheet: a-Si
AUTHOR	Schaeffer	Schaeffer	Keoleian	Frankl	Frankl	Frankl	Alsema	Gurzenich	Mathur	Pacca	Roes	Ito	Laleman
YEAR	1990	1990	1997	1997	1997	1997	2000	2004	2004	2007	2007	2008	2010
LIFETIME [yrs]	25	25	25	25	25	25	25	25	25	25	25	25	25
CAPACITY [kW]	2500	25000	0.022					1.56		22.6		58	3
EFFICIENCY [%]	6	8	5	6	6	6	7	5		6.3	6.3	6.9	7
WAFER THICKNESS [μm]
PRIMARY or ELECTRICITY	PRIMARY (35%)	PRIMARY (35%)	PRIMARY (undefined)	PRIMARY (39.1%)	PRIMARY (39.1%)	PRIMARY (39.1%)	PRIMARY (35%)	PRIMARY (31.7%)	ELECTRICITY	PRIMARY (30%)	PRIMARY (36% conversion efficiency)	PRIMARY (30%)	PRIMARY (35%)
CONVERSION FACTOR [%]	35	35	30	39.1	39.1	39.1	35	31.7	100	30	36	30	35
CAPACITY FACTOR [%]	15	15	15	15	15	15	15	15	15	15	15	15	15
RATED INSOLATION [W/m^2]				1000	1000	1000	1000
CONSTRUCTION TIME [yrs]									1
TOTAL MATERIALS [kWh(e)/Wp]				0.724074	0.724074	0.724074	0.550958
ERROR				0	0	0	0
TOTAL MANUFACTURE [kWh(e)/Wp]				0.724074	0.724074	0.724074
ERROR				0	0	0
TOTAL CELL [kWh(e)/Wp]				1.44815	1.44815	1.44815	0.550958
ERROR				0	0	0	0
TOTAL MODULE [kWh(e)/Wp]	2.8	1.925	2.26667	3.32511	3.32511	3.32511	2.40088	2.77561		1.14167	1.71	1.47858
ERROR	0	0	0	0	0	0	0	0		0	0	0
TOTAL SYSTEM [kWh(e)/Wp]	4.655	2.625		6.76446	4.68275	4.50173	4.99811	3.98988	5		2.46	3.04425
ERROR	0	0		0	0	0	0	0			0	0
TOTAL SYSTEM [kWh(e)/kWh(e)]	0.141705	0.0799087		0.20592	0.142549	0.137039	0.152149				0.0748858	0.0926712
ERROR	0	0		0	0	0	0				0	0

## Sheet: ribbon
AUTHOR	Fthenakis	de Wild-Scholten	Laleman
YEAR	2006	2009	2010
LIFETIME [yrs]	25	25	25
CAPACITY [kW]			3
EFFICIENCY [%]	11.5	13.2	12
WAFER THICKNESS [μm]	300-330	190
PRIMARY or ELECTRICITY	PRIMARY (31%)	PRIMARY (29%)	PRIMARY (35%)
CONVERSION FACTOR [%]	31	29	35
CAPACITY FACTOR [%]	15	15	15
RATED INSOLATION [W/m^2]	1000	1000
CONSTRUCTION TIME [yrs]
TOTAL MATERIALS [kWh(e)/Wp]
ERROR
TOTAL MANUFACTURE [kWh(e)/Wp]
ERROR
TOTAL CELL [kWh(e)/Wp]
ERROR
TOTAL MODULE [kWh(e)/Wp]	1.72222	0.945918
ERROR	0	0
TOTAL SYSTEM [kWh(e)/Wp]	2.09737	1.46953	2.91667
ERROR	0	0	0
TOTAL SYSTEM [kWh(e)/kWh(e)]	0.0638468	0.0447345	0.0887875
ERROR	0	0	0

## Sheet: CdTe
AUTHOR	Fthenakis	Raugei	Roes	Ito	Fthenakis	Raugei	Held	Laleman	Held
YEAR	2006	2007	2007	2008	2009	2009	2009	2010	2011
LIFETIME [yrs]	25	25	25	25	25	25	25	25	25
CAPACITY [kW]				65				3
EFFICIENCY [%]	9		9	9	10.9	10.9	10.9	7.1	10.9
WAFER THICKNESS [μm]
PRIMARY or ELECTRICITY	PRIMARY (31%)	PRIMARY (32%)	PRIMARY (36% conversion efficiency)	PRIMARY (30%)	PRIMARY (31%)	PRIMARY (29%)	PRIMARY (29%)	PRIMARY (35%)	PRIMARY (unspecified)
CONVERSION FACTOR [%]	31	32	36	30	31	29	29	35	30
CAPACITY FACTOR [%]	15	15	15	15	15	15	15	15	15
RATED INSOLATION [W/m^2]	1000				1000	1000	1000		1000
CONSTRUCTION TIME [yrs]
TOTAL MATERIALS [kWh(e)/Wp]
ERROR
TOTAL MANUFACTURE [kWh(e)/Wp]
ERROR
TOTAL CELL [kWh(e)/Wp]
ERROR
TOTAL MODULE [kWh(e)/Wp]	1.14815	0.675556	0.95	0.858583	0.76315	0.630403	0.592712		0.573394
ERROR	0	0	0	0	0	0	0		0
TOTAL SYSTEM [kWh(e)/Wp]	1.66673	1.94667	1.57	2.21275	1.19134	1.00066	1.02653	2.81944	0.909021
ERROR	0	0	0	0	0	0	0	0	0
TOTAL SYSTEM [kWh(e)/kWh(e)]	0.0507375	0.0592593	0.047793	0.0673592	0.0362659	0.0304616	0.031249	0.0858277	0.0276719
ERROR	0	0	0	0	0	0	0	0	0

## Sheet: CIGS
AUTHOR	Knapp	Roes	Raugei	Ito	Laleman
YEAR	2000	2007	2007	2008	2010
LIFETIME [yrs]	25	25	25	25	25
CAPACITY [kW]				80	3
EFFICIENCY [%]		11		11	10.7
WAFER THICKNESS [μm]
PRIMARY or ELECTRICITY	ELECTRICITY	PRIMARY (36%)	PRIMARY (32%)	PRIMARY (30%)	PRIMARY (35%)
CONVERSION FACTOR [%]	100	36	32	30	35
CAPACITY FACTOR [%]	15	15	15	15	15
RATED INSOLATION [W/m^2]
CONSTRUCTION TIME [yrs]
TOTAL MATERIALS [kWh(e)/Wp]
ERROR
TOTAL MANUFACTURE [kWh(e)/Wp]
ERROR
TOTAL CELL [kWh(e)/Wp]
ERROR
TOTAL MODULE [kWh(e)/Wp]	3.06944	3.46	2.46222	0.81925
ERROR	0	0	0	0
TOTAL SYSTEM [kWh(e)/Wp]		4.03	3.50222	1.86508	2.86806
ERROR		0	0	0	0
TOTAL SYSTEM [kWh(e)/kWh(e)]		0.122679	0.106613	0.0567757	0.0873076
ERROR		0	0	0	0

## Sheet: wind onshore
AUTHOR OR REF FROM KUBISZEWSKI (2010)	[4]	[4]	[4]	[21]	[21]	[21]	[4]	Vestas	[27]	[27]	[27]	[27]	[27]	[27]	[25]	[25]	[25]	[25]	[25]	[25]	[25]	[25]	[25]	[25]	[25]	[25]	[25]	[25]	[25]	[25]	[25]	[25]	[25]	[25]	[25]	[25]	[25]	[25]	[25]	Vestas	[29]	[30]	Vestas	Ardente	Chen	Yang	Vestas	Vestas	Vestas
YEAR	1980	1990	1991	1999	1999	1999	2000	2004	2004	2004	2004	2004	2004	2004	2004	2004	2004	2004	2004	2004	2004	2004	2004	2004	2004	2004	2004	2004	2004	2004	2004	2004	2004	2004	2004	2004	2004	2004	2004	2006	2006	2006	2007	2008	2011	2011	2011	2011	2011
LOCATION	UK	Denmark	Germany	USA	USA	USA	Denmark	Denmark	Germany	Germany	Germany	Germany	Germany	Germany	Germany	Germany	Germany	Germany	Germany	Germany & Brazil	Germany & Brazil	Germany & Brazil	Germany & Brazil	Germany & Brazil	Germany & Brazil	Germany & Brazil	Germany & Brazil	Germany & Brazil	Germany & Brazil	Brazil	Brazil	Brazil	Brazil	Brazil	Brazil	Brazil	Brazil	Brazil	Brazil	Denmark	Italy	Germany	Denmark	Italy	China	China	Denmark	Denmark	Denmark
LIFETIME [yrs]	25	20	20	30	20	25	20	20	20	20	20	20	20	20																										20	20		20	20	20	20	20	20	20
TURBINE INFORMATION		3	3	Kenetech	Tacke	Zond			Enercon	Enercon	Enercon	Enercon	Enercon	Enercon	Enercon	Enercon	Enercon	Enercon	Enercon	Enercon	Enercon	Enercon	Enercon	Enercon	Enercon	Enercon	Enercon	Enercon	Enercon	Enercon	Enercon	Enercon	Enercon	Enercon	Enercon	Enercon	Enercon	Enercon	Enercon								V112	V-80	V-90
		blades	blades	KVS-33	600e	Z-46			E-40	E-40	E-40	E-66	E-66	E-66	E-40	E-40	E-40	E-40	E-40	E-40	E-40	E-40	E-40	E-40	E-40	E-40	E-40	E-40	E-40	E-40	E-40	E-40	E-40	E-40	E-40	E-40	E-40	E-40	E-40	3 blade
ROTOR DIAMETER (m)	46	19	19	32.9	46	46			40.3	40.3	40.3	66	66	66	40.3	40.3	40.3	40.3	40.3	40.3	40.3	40.3	40.3	40.3	40.3	40.3	40.3	40.3	40.3	40.3	40.3	40.3	40.3	40.3	40.3	40.3	40.3	40.3	40.3		50			50	64	64
HUB HEIGHT (m)		22.6	22.6	36.6	60	48.5	41.5	78	44	55	65	67	67	67	44	55	55	55	65	44	55	55	55	65	44	55	55	55	65	44	55	55	55	65	44	55	55	55	65		55		105	55	68	68	84	80	80
ONSHORE or OFFSHORE	on	on	on	on	on	on	on	On-shore	on	on	on	on	on	on	on	on	on	on	on	on	on	on	on	on	on	on	on	on	on	on	on	on	on	on	on	on	on	on	on	On-shore	on	on	On-shore	On-shore	On-shore	On-shore	On-shore	On-shore	On-shore
TURBINE CAPACITY [kW]	1000	95	95	342.5	600	750	500	2000	500	500	500	1500	1500	1500	500	500	500	500	500	500	500	500	500	500	500	500	500	500	500	500	500	500	500	500	500	500	500	500	500	1650	7260	1500	3000	660	1250	1250	3000	2000	2000
FARM CAPACITY [kW]								16000																																300300			300000	7260	30000	30000	99000	50000	50000
CAPACITY FACTOR [%]	18.3	25.2	20.5	24	31	35	40	32.16	29	38	53	32	40	52																										39			30.02	19	25	24.88	43.36	47.2	35.71
ANALYSIS TYPE	I/O	PA	PA	I/O	I/O	I/O		Process	PA	PA	PA	PA	PA	PA	PA-I/O	PA-I/O	PA-I/O	PA-I/O	PA-I/O	PA-I/O	PA-I/O	PA-I/O	PA-I/O	PA-I/O	PA-I/O	PA-I/O	PA-I/O	PA-I/O	PA-I/O	PA-I/O	PA-I/O	PA-I/O	PA-I/O	PA-I/O	PA-I/O	PA-I/O	PA-I/O	PA-I/O	PA-I/O	Process	I/O		Process			Hybrid	Process	Process	Process
OPERATIONAL (o) or CONCEPTUAL ©	c	o	o	o	o	o	o	o	c	c	c	c	c	c	c	c	c	c	c	c	c	c	c	c	c	c	c	c	c	c	c	c	c	c	c	c	c	c	c	c	o	c	o	o	o	o	c	c	c
GROSS ENERGY REQUIREMENT (GER) [MJ(p)]								1.04704e+08																																2.21511e+09			1.54828e+09	46400000	221000000	221000000	902546400	520974720	5.35059e+08
ERROR																																												4300000	0
CED [MJ(p)/W]	11.5422	2.22607	8.79576	9.87214	11.5014	7.07538	3.28073	6.54401	2.61298	4.52214	8.79688	3.1536	5.04576	8.4096																										7.37633			5.16094	6.39118	7.36667	7.36667	9.11663	10.4195	10.7012
CED [kWh(p)/W]	3.20616	0.618353	2.44327	2.74226	3.19482	1.96538	0.911313	1.81778	0.725829	1.25615	2.44358	0.876	1.4016	2.336																										2.04898			1.43359	1.77533	2.0463	2.0463	2.5324	2.8943	2.97255
ELECTRICITY CONVERSION FACTOR [%, 30% unless specified in study]	30	30	30	30	30	30	30	27.78	30	30	30	30	30	30	30	30	30	30	30	30	30	30	30	30	30	30	30	30	30	30	30	30	30	30	30	30	30	30	30	27.87	30	30	27.8	34.98	30	30	28.1088	30	30
GE(e)R [kWh(e)]								29086800																																617351644			430422200	1.62307e+07			253695000
ERROR																																												1504140
TOTAL ELECTRICITY OUTPUT [kWh(e)]								9.01509e+08																																20518898400			15778512000	242120000	1308000000	1307692800	7521220000	4134720000	3129000000
EROI (kWh(e)/kWh(p)]	12.5	71.4	14.7	23	17	39	76.9	30.9962	70	53	38	64	50	39	8.4	7.8	6.2	4.7	4.9	22.5	21.2	16.4	12	12.4	27.7	25.7	20	15.6	16.4	32.7	30	24	18.9	18.9	40	40	32.7	25.7	25.7	33.3473	19.2	29.4	36.6875	18.1818	21.2766	21.3018	30	28.5714	21.0526
ENERGY INTENSITY[kWh(p)/kWh(e)]	0.08	0.0140056	0.0680272	0.0434783	0.0588235	0.025641	0.0130039	0.032262	0.0142857	0.0188679	0.0263158	0.015625	0.02	0.025641	0.119048	0.128205	0.16129	0.212766	0.204082	0.0444444	0.0471698	0.0609756	0.0833333	0.0806452	0.0361011	0.0389105	0.05	0.0641026	0.0609756	0.030581	0.0333333	0.0416667	0.0529101	0.0529101	0.025	0.025	0.030581	0.0389105	0.0389105	0.0299874	0.0520833	0.0340136	0.0272572	0.055	0.047	0.0469444	0.0333333	0.035	0.0475
ERROR																																												0.015	0
CE(e)D [kWh(e)/W(p)]	0.961848	0.185506	0.73298	0.822678	0.958447	0.589615	0.273394	0.504979	0.217749	0.376845	0.733074	0.2628	0.42048	0.7008	0	0	0	0	0	0	0	0	0	0	0	0	0	0	0	0	0	0	0	0	0	0	0	0	0	0.571051	0	0	0.398539	0.62101	0.613889	0.613889	0.711827	0.868291	0.891765
ERROR																																												0.207182	0
CO2 INTENSITY [g-CO2/kWh(e)]				14.4	20.2	8.9	9.7								45	48	61	81	77	15	16	20	27	26	8	8	10	13	12	3	3	3	4	4	2	2	2	3	3		14.8e	10.2		13.65	2
ERROR																																												4.85
ENERGY PAYBACK TIME [yrs]	2	0.280112	1.36054	1.30435	1.17647	0.641026	0.260078		0.285714	0.377358	0.526316	0.3125	0.4	0.512821	0	0	0	0	0	0	0	0	0	0	0	0	0	0	0	0	0	0	0	0	0	0	0	0	0		1.04167	0

## Sheet: wind offshore
AUTHOR OR REF FROM KUBISZEWSKI (2010)	[4]	[4]	Vestas	[26]	Vestas	[30]	Weinzettel	Wagner
YEAR	1997	2000	2004	2004	2006	2006	2009	2011
LOCATION	Denmark	Denmark	Denmark	Germany	Denmark	Germany		Germany
LIFETIME [yrs]	20	20	20	20	20		20	20
TURBINE INFORMATION	3			Repower Systems AG				6 RePower 5M and 6 Multibrid M5000
	blades	3-blades
ROTOR DIAMETER (m)	64	39		126.5			116
HUB HEIGHT (m)	55	40.5	60	95	80		100
ONSHORE or OFFSHORE	off	off	Off-shore	off	Off-shore	off	Off-shore	Off-shore
TURBINE CAPACITY [kW]	1500	500	2000	5000	3000	2500	5000	5000
FARM CAPACITY [kW]			160000		300000		200000	60000
CAPACITY FACTOR [%]	38.4	40	46.16	50	54.16		53	44.52
ANALYSIS TYPE	I/O		Process	PA	Process		Process
OPERATIONAL (o) or CONCEPTUAL ©	c	o	o	c	o	c	c	o
GROSS ENERGY REQUIREMENT (GER) [MJ(p)]			1.74936e+09		2.89849e+09		278568000	2300000000
ERROR
CED [MJ(p)/W]	7.27317	4.91789	10.9335	21.3081	9.66165		1.39284	38.3333
CED [kWh(p)/W]	2.02032	1.36608	3.03708	5.91892	2.68379		0.3869	10.6481
ELECTRICITY CONVERSION FACTOR [%, 30% unless specified in study]	30	30	27.78	30	27.94	30	40	30
GE(e)R [kWh(e)]			485972400		809839100		111427200
ERROR
TOTAL ELECTRICITY OUTPUT [kWh(e)]			1.29396e+10		28466496000		18571200000	4680000000
EROI (kWh(e)/kWh(p)]	33.3	51.3	26.6283	14.8	35.3561	32.3	18.5185	7.32522
ENERGY INTENSITY[kWh(p)/kWh(e)]	0.03003	0.0194932	0.0375541	0.0675676	0.0282837	0.0309598	0.054	0.136515
ERROR
CE(e)D [kWh(e)/W(p)]	0.606097	0.409825	0.843702	1.77568	0.749851	0	0.15476	3.19444
ERROR
CO2 INTENSITY [g-CO2/kWh(e)]		16.5				8.9
ERROR
ENERGY PAYBACK TIME [yrs]	0.600601	0.389864		0.33		0

## Sheet: wind unspecified
AUTHOR OR REF FROM KUBISZEWSKI (2010)	[4]	[4]	[4]	[4]	[4]	[4]	[4]	[4]	[4]	[4]	[4]	[4]	[4]	[4]	[4]	[4]	[4]	[4]	[4]	[4]	[4]	[4]	[4]	[4]	[4]	[4]	[4]	[4]	[4]	[4]	[4]	[4]	[4]	[4]	[4]	[4]	[4]	[4]	[4]	[4]	[4]	[4]	[4]	[4]	[4]	[4]	[4]	[4]	[4]
YEAR	1977	1980	1981	1983	1983	1983	1983	1983	1990	1990	1991	1991	1991	1991	1991	1991	1991	1991	1991	1991	1991	1991	1991	1991	1991	1992	1992	1992	1992	1992	1993	1994	1994	1994	1995	1996	1996	1996	1996	1996	1996	1996	1996	1996	1996	1996	1996	1997	1997
LOCATION	USA	UK	USA	Germany	Germany	Germany	Germany	Germany	Denmark	Germany	Japan	Germany	Germany	Germany	Germany	Germany	Germany	Germany	Germany	Germany	Germany	Germany	Germany	Germany	Germany	Japan	Japan	Japan	Germany	Germany	Germany	Germany	Germany	Germany	UK	Japan	Japan	Japan	Japan	Japan	Germany	UK	Switzerland	Germany	Switzerland	Germany	Germany	Denmark	Denmark
LIFETIME [yrs]	30	25	20	15	15	15	15	20	25	20	20	20	20	20	20	20	20	20	20	20	20	20	20	20	20	20	30	30	20	20	20	20	20	20	20	30	20	20	20	20	20	20	20	20	20	20	20	20	20
TURBINE INFORMATION	2							2		3		2	2		3	2	3	3	3		2		3		2				3	3				2/3	3		1984	27	28	31	3		2	3	3	3	3	1980	1980
	blades							blades		blades		blades	blades		blades	blades	blades	blades	blades		blades		blades		blades				blades	blades				blades	blades						blades		blades	blades	blades	blades	blades
ROTOR DIAMETER (m)	60	46	4.3					100		32		12.5	14.8	12.5	19	34	23	25	26	27	52	32	35	80	100		30	30	1.5	32				39	30		30				54		12.5	20	23.8	54	60	10	10.5
HUB HEIGHT (m)	50		20					100		34		14.8	22		22.6	24.2	30	32	30		30.5		36		100				11.6	34				41	30						55		22	30	30	55	50	18	18
ONSHORE or OFFSHORE
TURBINE CAPACITY [kW]	1500	1000	3	2	6	12.5	32.5	3000	150	300	100	30	33	45	95	100	150	165	200	225	265	300	450	3000	3000	100	100	100	0.3	300	300	500	300	500	350	100	100	170	300	400	1000	6600	30	100	150	1000	1000	15	22
FARM CAPACITY [kW]
CAPACITY FACTOR [%]	50.4	18.3	26.8	45.7	45.7	45.7	45.7	45.7	30.1	28.9	31.5	14.4	29.4	33.5	20.5	20.9	25.6	23.2	21	39.9	19	39.9	20	34.2	30.4	31.5	28	40	38.8	41.9	22.8	27.4	22.8	36.5	30	20	18	22.5	18	18	18.5	29	7.9	31.4	7.6	18.5	36.2	20.5	19.9
ANALYSIS TYPE	I/O	I/O	I/O	I/O	I/O	I/O	I/O	I/O	PA	PA	I/O	PA	PA	PA	PA	PA	PA	PA	PA	PA	PA	PA	PA	PA	PA	I/O	I/O	I/O	PA	PA	PA	I/O	PA	PA	PA	I/O	I/O	I/O	I/O	I/O	I/O	I/O	PA	PA	PA	PA	PA	I/O	I/O
OPERATIONAL (o) or CONCEPTUAL ©	c	c	o	o	o	o	o	o	o	o	o	o	o	o	o	o	o	o	o	o	o	c	o	c	o	o	o	o	o	c	o	o	o	o	o	o	o	o	o	o	o	o	o	o	o	o	c	o	o
GROSS ENERGY REQUIREMENT (GER) [MJ(p)]
ERROR
CED [MJ(p)/W]	10.9615	23.652	169.033	93.991	63.5821	43.2359	26.0457	221.722	4.98547	5.64328	49.6692	7.69692	9.08979	11.1794	6.59682	7.89344	7.91492	5.41952	7.008	7.79125	7.68185	9.32064	6.06462	9.7165	12.4506	68.5092	8.74265	20.4558	21.8499	7.14248	6.62692		3.16053	15.6607	7.95025	82.2678	51.6044	24.4676	13.3564	9.95874		7.31635	16.0732	23.861	9.58694		7.98324	15.578	15.4955
CED [kWh(p)/W]	3.04486	6.57	46.9536	26.1086	17.6617	12.01	7.23492	61.5895	1.38485	1.56758	13.797	2.13803	2.52494	3.1054	1.83245	2.19262	2.19859	1.50542	1.94667	2.16424	2.13385	2.58907	1.68462	2.69903	3.45849	19.0303	2.42851	5.68216	6.06943	1.98402	1.84081		0.877925	4.3502	2.2084	22.8522	14.3345	6.79655	3.71012	2.76632		2.03232	4.46477	6.62805	2.66304		2.21757	4.32723	4.3043
ELECTRICITY CONVERSION FACTOR [%, 30% unless specified in study]	30	30	30	30	30	30	30	30	30	30	30	30	30	30	30	30	30	30	30	30	30	30	30	30	30	30	30	30	30	30	30	30	30	30	30	30	30	30	30	30	30	30	30	30	30	30	30	30	30
GE(e)R [kWh(e)]
ERROR
TOTAL ELECTRICITY OUTPUT [kWh(e)]
EROI (kWh(e)/kWh(p)]	43.5	6.1	1	2.3	3.4	5	8.3	1.3	47.6	32.3	4	11.8	20.4	18.9	19.6	16.7	20.4	27	18.9	32.3	15.6	27	20.8	22.2	15.4	2.9	30.3	18.5	11.2	37	21.7		45.5	14.7	23.8	2.3	2.2	5.8	8.5	11.4		25	3.1	8.3	5		28.6	8.3	8.1
ENERGY INTENSITY[kWh(p)/kWh(e)]	0.0229885	0.163934	1	0.434783	0.294118	0.2	0.120482	0.769231	0.0210084	0.0309598	0.25	0.0847458	0.0490196	0.0529101	0.0510204	0.0598802	0.0490196	0.037037	0.0529101	0.0309598	0.0641026	0.037037	0.0480769	0.045045	0.0649351	0.344828	0.0330033	0.0540541	0.0892857	0.027027	0.0460829		0.021978	0.0680272	0.0420168	0.434783	0.454545	0.172414	0.117647	0.0877193		0.04	0.322581	0.120482	0.2		0.034965	0.120482	0.123457
ERROR
CE(e)D [kWh(e)/W(p)]	0.913457	1.971	14.0861	7.83258	5.29851	3.60299	2.17047	18.4769	0.415456	0.470274	4.1391	0.64141	0.757482	0.931619	0.549735	0.657787	0.659576	0.451627	0.584	0.649271	0.640154	0.77672	0.505385	0.809708	1.03755	5.7091	0.728554	1.70465	1.82083	0.595206	0.552243	0	0.263378	1.30506	0.662521	6.85565	4.30036	2.03897	1.11304	0.829895	0	0.609696	1.33943	1.98841	0.798912	0	0.66527	1.29817	1.29129
ERROR
CO2 INTENSITY [g-CO2/kWh(e)]									8.81		71.7e															95.6e	33.7				11e	18.2e		8.1	9.1	123.6e	123.7e	47.4e	34.9e	24.1e	22e		52	17	28	14e	10
ERROR
ENERGY PAYBACK TIME [yrs]	0.689655	4.09836	20	6.52174	4.41176	3	1.80723	15.3846	0.52521	0.619195	5	1.69492	0.980392	1.0582	1.02041	1.1976	0.980392	0.740741	1.0582	0.619195	1.28205	0.740741	0.961538	0.900901	1.2987	6.89655	0.990099	1.62162	1.78571	0.540541	0.921659		0.43956	1.36054	0.840336	13.0435	9.09091	3.44828	2.35294	1.75439		0.8	6.45161	2.40964	4		0.699301	2.40964	2.46914
[truncated: 44 more columns]
